# Supplementary material
Source: MDPI journal article supplement (https://www.mdpi.com/2313-433X/9/10/233)
Supplement: s1 [file s1]

| #  | S1                                            | S2                                                                                                            |
|----|-----------------------------------------------|---------------------------------------------------------------------------------------------------------------|
| 1  | La bise et le soleil se disputaient           | La bise et le soleil se disputaient, chacun assurant qu'il était le plus fort, quand                          |
| 2  | chacun assurant qu'il était le plus fort      | fort, quand ils ont vu un voyageur qui s'avavançait, enveloppé dans son manteau. Ils                          |
| 3  | quand ils ont vu un voyageur qui s'avavançait | manteaux. Ils sont tombés d'accord que celui qui arriverait le premier à faire ôter son                       |
| 4  | enveloppé dans son manteau                    | son manteaux au voyageur serait regardé comme le plus fort. Alors                                             |
| 5  | Ils sont tombés d'accord                      | fort. Alors la bise s'est mise à souffler de toute sa force mais plus elle soufflait, plus                    |
| 6  | que celui qui arriverait le premier           | plus le voyageur serrait son manteaux autour de lui et à la fin, la bise a renoncé à le lui faire ôter. Alors |
| 7  | à faire ôter son manteaux au voyageur         | ôter. Alors le soleil a commencé à briller et au bout d'un moment, le voyageur, réchauffé a ôté son manteau.  |
| 8  | serait regardé comme le plus fort.            | manteaux. Ainsi, la bise a dû reconnaître que le soleil était le plus fort des deux.                          |
| 9  | Alors la bise s'est mise à souffler           |                                                                                                               |
| 10 | de toute sa force mais plus elle soufflait    |                                                                                                               |
| 11 | plus le voyageur serrait son manteaux         |                                                                                                               |
| 12 | autour de lui et à la fin,                    |                                                                                                               |
| 13 | la bise a renoncé à le lui faire ôter.        |                                                                                                               |
| 14 | Alors le soleil a commencé à briller          |                                                                                                               |
| 15 | et au bout d'un moment, le voyageur,          |                                                                                                               |
| 16 | réchauffé a ôté son manteau.                  |                                                                                                               |
| 17 | Ainsi, la bise a dû reconnaître               |                                                                                                               |
| 18 | que le soleil était le plus fort des deux.    |                                                                                                               |

**Supplementary Table S1.** The text fragments used for each volunteer. The bold denotes the actually acquired data.
